# Supplementary material for: Does Small Ruminant Lentivirus Infection in Goats Predispose to Bacterial Infection of the Mammary Gland? A Preliminary Study
Source: MDPI journal article supplement (doi:10.3390/ani11071851), 2021-06-22
Supplement: s1 [file s1]

Table S1. Prevalence of bacteria in milk samples from SRLV-positive and SRLV-negative goats in subsequent lactations

| Lactation               | SRLV status          |                   |                     |                   | p-value of $\chi^2$ test   |
|-------------------------|----------------------|-------------------|---------------------|-------------------|----------------------------|
|                         | seropositive (n=155) |                   | seronegative (n=80) |                   |                            |
|                         | n                    | % (CI 95%)        | n                   | % (CI 95%)        |                            |
| 1 <sup>st</sup> (n=30)  | 11 / 15              | 73.3 (48.0, 89.1) | 10 / 15             | 66.7 (41.7, 84.8) | 0.693                      |
| 2 <sup>nd</sup> (n=20)  | 4 / 10               | 40.0 (16.8, 68.7) | 2 / 10              | 20.0 (5.7, 51.0)  | 0.329                      |
| 3 <sup>rd</sup> (n=38)  | 4 / 21               | 19.0 (7.7, 40.0)  | 4 / 17              | 23.5 (9.6, 47.3)  | 0.735                      |
| 4 <sup>th</sup> (n=56)  | 13 / 33              | 39.4 (24.7, 56.3) | 7 / 23              | 30.4 (15.6, 50.9) | 0.489                      |
| ≥5 <sup>th</sup> (n=91) | 39 / 76              | 51.3 (40.3, 62.2) | 1 / 15              | 6.7 (1.2, 29.8)   | 0.002 / 0.008 <sup>a</sup> |

<sup>a</sup> Bonferroni correction
